# Supplementary material for: Circulating Interleukins-33 and -37 and Their Associations with Metabolic Syndrome in Arab Adults
Source: MDPI journal article supplement (doi:10.3390/ijms25020699), 2024-01-05
Supplement: s1 [file s1]

Supplementary table S1: Clinical Characteristic of the subjects.

| Parameters               | All            |                | Age and BMI adjusted P-value | Males          |                 | Age and BMI adjusted P-value | Females        |               | Age and BMI adjusted P-value |
|--------------------------|----------------|----------------|------------------------------|----------------|-----------------|------------------------------|----------------|---------------|------------------------------|
|                          | Control        | MetS           |                              | Control        | MetS            |                              | Control        | MetS          |                              |
| N                        | 240            | 177            |                              | 104            | 47              |                              | 136            | 130           |                              |
| Age                      | 39.4±9.2       | 44.0±8.1       |                              | 38.6±9.4       | 43.1±9.7        |                              | 39.9±8.9       | 44.3±7.5      |                              |
| BMI (kg/m <sup>2</sup> ) | 28.7±5.5       | 33.2±6.5       |                              | 28.6±5.1       | 30.3±5.9        | 0.072                        | 28.9±5.8       | 34.2±6.4      |                              |
| Waist (cm)               | 84.7±16.2      | 99.6±14.8      | <0.001                       | 89.1±17.5      | 100.3±22.3      | 0.025                        | 81.4±14.4      | 99.3±11.2     | <0.001                       |
| WHR                      | 0.86±0.10      | 0.89±0.10      | 0.001                        | 0.90±0.10      | 0.95±0.10       | 0.021                        | 0.82±0.09      | 0.87±0.08     | <0.001                       |
| Systolic BP              | 117.7±11.1     | 128.3±15.0     | <0.001                       | 119.2±9.6      | 129.9±15.6      | <0.001                       | 116.6±11.9     | 127.7±14.8    | <0.001                       |
| Diastolic BP             | 73.8±9.2       | 79.5±10.3      | <0.001                       | 74.3±8.6       | 79.3±10.5       | 0.015                        | 73.5±9.7       | 79.5±10.3     | <0.001                       |
| Glucose (mmol/l)         | 5.6±1.9        | 7.1±2.1        | <0.001                       | 5.6±2.0        | 6.5±1.4         | 0.035                        | 5.5±1.9        | 7.3±2.3       | <0.001                       |
| HbA1C (%)                | 5.5±1.2        | 6.2±1.2        | <0.001                       | 5.5±0.9        | 5.8±1.0         | 0.168                        | 5.5±1.4        | 6.3±1.3       | <0.001                       |
| Insulin (uU/ml)          | 13.3±6.8       | 17.4±5.2       | <0.001                       | 13.2±8.5       | 19.1±4.6        | 0.020                        | 13.4±5.6       | 16.9±5.3      | 0.026                        |
| Chol (mmol/l)            | 5.2±1.0        | 5.1±1.1        | 0.314                        | 5.3±1.0        | 5.1±1.1         | 0.282                        | 5.2±1.1        | 5.2±1.1       | 0.582                        |
| HDL (mmol/l)             | 1.31±0.4       | 1.02±0.3       | <0.001                       | 1.14±0.3       | 0.93±0.2        | <0.001                       | 1.45±0.4       | 1.05±0.3      | <0.001                       |
| Triglycerides            | 1.24 (0.9-1.6) | 1.86 (1.3-2.4) | <0.001                       | 1.33 (1.0-1.8) | 2.0 (1.7-2.5)   | <0.001                       | 1.14 (0.9-1.5) | 1.8 (1.3-2.3) | <0.001                       |
| IL-33 (pg/ml)            | 3.34 (1-3.9)   | 3.42 (2.3-3.9) | 0.057                        | 3.6 (1.6-4.1)  | 3.79 (3.5-4.1)  | 0.187                        | 2.6 (0.9-3.7)  | 3.2 (1.6-3.9) | 0.009                        |
| IL37 (pg/ml)             | 2.92 (2.1-6.1) | 5.11 (2.2-8.3) | 0.012                        | 2.9 (2.1-5.5)  | 2.83 (2.1-5.87) | 0.973                        | 2.92 (2.1-6.2) | 5.6 (2.4-9.1) | 0.009                        |

Note: Data Presented mean ± SD. P-value significant at 0.01 and 0.05 level.
